# Supplementary material
Source: PubMed Central journal article supplement (PMC6072010)
Supplement: EHP2503.s001.acco.pdf [file EHP2503.s001.acco.pdf]

**Note to readers with disabilities:** *EHP* strives to ensure that all journal content is accessible to all readers. However, some figures and Supplemental Material published in *EHP* articles may not conform to [508 standards](#) due to the complexity of the information being presented. If you need assistance accessing journal content, please contact [ehp508@niehs.nih.gov](mailto:ehp508@niehs.nih.gov). Our staff will work with you to assess and meet your accessibility needs within 3 working days.

### **Supplemental Material**

#### **Global Estimate of Lung Cancer Mortality Attributable to Residential Radon**

Janet Gaskin, Doug Coyle, Jeff Whyte and Daniel Krewksi

#### **Table of Contents**

**Table S1.** References for Reported National Residential Radon Exposures.

**Table S2.** National Male and Female Adult Smoking Prevalence.

**Table S3.** Radon Population Attributable Risk (PAR) of Lung Cancer Mortality, estimated from extending the pooled residential studies to model lifetime exposure.

#### **References**

**Table S1 – References for Reported National Residential Radon Exposures**

| <b>Country</b> | <b>RnArithMn<sup>a</sup></b><br>(Bq/m <sup>3</sup> ) | <b>RnGeoMn<sup>b</sup></b><br>(Bq/m <sup>3</sup> ) | <b>RnGeoSD<sup>c</sup></b> | <b>Reference</b>             |
|----------------|------------------------------------------------------|----------------------------------------------------|----------------------------|------------------------------|
| Albania        | 101                                                  |                                                    |                            | (Tushe et al. 2016)          |
| Algeria        | 30                                                   |                                                    |                            | (Cherouati and Djeffal 1988) |
| Argentina      | 37                                                   |                                                    |                            | (Canoba et al. 2002)         |
| Armenia        | 104                                                  |                                                    | 1.3                        | (UNSCEAR 2006)               |
| Australia      | 11.6                                                 | 8.7                                                | 2.1                        | (Langroo et al. 1990)        |
| Austria        | 99                                                   | 61                                                 |                            | (Friedmann 2005)             |
| Belarus        | 31.8                                                 |                                                    |                            | (UNSCEAR 2006)               |
| Belgium        | 48                                                   | 38                                                 | 2                          | (UNSCEAR 2006)               |
| Brazil         | 41                                                   |                                                    |                            | (Veiga et al. 2007)          |
| Bulgaria       |                                                      | 80                                                 | 2.1                        | (Ivanova et al. 2013)        |
| Canada         |                                                      | 41.9                                               | 2.8                        | (Chen et al. 2012)           |
| Chile          | 25                                                   |                                                    | 1.8                        | (Stuardo 1996)               |
| China          | 43.8                                                 | 34.4                                               |                            | (UNSCEAR 2006)               |
| Croatia        | 68                                                   | 50                                                 | 2.3                        | (Radolić et al. 2006)        |
| Cuba           | 7.7                                                  | 5.2                                                | 3.3                        | (UNSCEAR 2006)               |
| Cyprus         | 7                                                    | 7                                                  | 2.6                        | (UNSCEAR 2006)               |
| Czech Republic | 118                                                  | 94.4                                               | 1.84                       | (UNSCEAR 2006)               |
| Denmark        | 59                                                   | 39                                                 | 2.2                        | (UNSCEAR 2006)               |
| Ecuador        | 94.3                                                 |                                                    |                            | (Canoba et al. 2002)         |
| Egypt          | 9                                                    |                                                    |                            | (UNSCEAR 2006)               |
| Estonia        | 60                                                   |                                                    |                            | (Pahapill et al. 2003)       |
| Finland        | 120                                                  | 84                                                 | 2.1                        | (UNSCEAR 2006)               |
| France         | 63                                                   |                                                    | 2.0                        | (Billon et al. 2005)         |
| Germany        | 49                                                   | 37                                                 | 2.2                        | (Haucke 2010)                |
| Greece         | 55                                                   | 44                                                 | 2.4                        | (Nikolopoulos et al. 2005)   |

|                   |       |      |      |                                      |
|-------------------|-------|------|------|--------------------------------------|
| Hungary           |       | 62   | 2.07 | (Hámori et al. 2006)                 |
| Iceland           | 10    |      |      | (UNSCEAR 2006)                       |
| India             | 57    | 42   | 2.2  | (UNSCEAR 2006)                       |
| Indonesia         | 35.1  | 35.1 | 1.2  | (UNSCEAR 2006)                       |
| Iran              | 82    |      |      | (UNSCEAR 2006)                       |
| Ireland           | 77    | 51   | 2.4  | (Dowdall et al. 2017)                |
| Israel            | 31    |      |      | (Epstein et al. 2014)                |
| Italy             | 70    | 52   | 2.1  | (Bohicchio et al. 1999)              |
| Japan             | 13.7  | 10.4 | 2    | (Suzuki et al. 2010)                 |
| Kazakstan         | 15    |      |      | (UNSCEAR 2006)                       |
| Kuwait            | 32.8  | 26.5 | 1.9  | (Al-Azmi et al. 2008)                |
| Lithuania         | 55    | 36.5 |      | (UNSCEAR 2006)                       |
| Luxembourg        | 110   | 70   | 2    | (UNSCEAR 2006)                       |
| Malaysia          | 14    |      |      | (UNSCEAR 2006)                       |
| Mexico            | 84    | 82.1 | 1.25 | (Espinosa and Gammage 2011)          |
| Montenegro        | 105   | 49.6 | 3.2  | (Vukotic et al. 2008)                |
| Netherlands       | 15.6  | 12.2 |      | (Smetsers et al. 2016)               |
| New Zealand       | 21.5  | 19.5 |      | (UNSCEAR 2006)                       |
| Norway            | 74.5  | 38   | 3.19 | (Stigum et al. 2003)                 |
| Pakistan          | 70    |      |      | (Faheem et al. 2008)                 |
| Paraguay          | 28    |      |      | (UNSCEAR 2006)                       |
| Peru              | 32.29 |      |      | (Canoba et al. 2002)                 |
| Philippines       | 23    | 22   | 1.13 | (UNSCEAR 2006)                       |
| Poland            | 165   | 133  | 1.91 | (Kozak et al. 2011; Przylibski 2015) |
| Portugal          | 62    | 45   | 2.2  | (Faisca et al. 1992)                 |
| Republic of Korea | 62    | 49   | 2    | (Kim et al. 2011)                    |
| Romania           | 126   | 84   | 2.5  | (Cosma et al. 2013)                  |
| Russian           | 48    |      |      | (Yarmoshenko et al. 2015)            |

|                      |      |      |     |                               |
|----------------------|------|------|-----|-------------------------------|
| Federation           |      |      |     |                               |
| Saudi Arabia         | 22   |      |     | (Abu-Jarad et al. 2003)       |
| Slovakia             |      | 48   | 3.3 | (Vicanova et al. 1998)        |
| Slovenia             | 87   | 60   | 2.2 | (Križman et al. 1996)         |
| Spain                | 80.3 | 52.9 | 2.5 | (Sainz-Fernandez et al. 2014) |
| Sweden               | 90   |      |     | (Axelsson et al. 2015)        |
| Switzerland          | 71   | 51   |     | (Menzler et al. 2008)         |
| Syrian Arab Republic | 44   |      |     | (Othman et al. 1996)          |
| Thailand             | 23   | 16   | 1.2 | (UNSCEAR 2006)                |
| Tunisia              | 45.5 |      |     | (El May et al. 2008)          |
| Turkey               | 81   | 57   | 2.3 | (Celebi et al. 2015)          |
| UK                   | 20   | 14   | 3.2 | (UNSCEAR 2006)                |
| USA                  | 46   | 25   | 3.1 | (Marcinowski et al. 1994)     |
| Venezuela            | 52.5 |      |     | (Canoba et al. 2002)          |

Notes: a) RnArithMn - arithmetic mean of national radon distribution, b) RnGeoMn - geometric mean of national radon distribution, c) RnGeoSD - geometric standard deviation of national radon distribution.

**Table S2 – National Male and Female Adult Smoking Prevalence**

| <b>Country</b>        | <b>Male Smoking Prevalence (%)<br/>Mean ± SD</b> | <b>Female Smoking Prevalence (%)<br/>Mean ± SD</b> |
|-----------------------|--------------------------------------------------|----------------------------------------------------|
| <b>Albania</b>        | 52 ± 6.3                                         | 8.2 ± 1.3                                          |
| <b>Algeria</b>        | 28 ± 6.1                                         | 2.0 ± 0.2                                          |
| <b>Argentina</b>      | 32 ± 3.1                                         | 21 ± 2.1                                           |
| <b>Armenia</b>        | 55 ± 5.1                                         | 1.7 ± 0.2                                          |
| <b>Australia</b>      | 18 ± 1.8                                         | 15 ± 1.4                                           |
| <b>Austria</b>        | 37 ± 5.8                                         | 36 ± 6.2                                           |
| <b>Belarus</b>        | 49 ± 5.1                                         | 11 ± 1.2                                           |
| <b>Belgium</b>        | 28 ± 4.9                                         | 21 ± 4.2                                           |
| <b>Brazil</b>         | 21 ± 2.4                                         | 12 ± 1.5                                           |
| <b>Bulgaria</b>       | 45 ± 5.1                                         | 30 ± 4.0                                           |
| <b>Canada</b>         | 20 ± 1.7                                         | 14 ± 1.3                                           |
| <b>Chile</b>          | 42 ± 6.1                                         | 37 ± 5.1                                           |
| <b>China</b>          | 49 ± 5.0                                         | 2.0 ± 0.2                                          |
| <b>Croatia</b>        | 39 ± 5.1                                         | 32 ± 4.0                                           |
| <b>Cuba</b>           | 53 ± 15.4                                        | 20 ± 6.2                                           |
| <b>Cyprus</b>         | 41 ± 6.5                                         | 18 ± 4.0                                           |
| <b>Czech Republic</b> | 38 ± 4.0                                         | 29 ± 3.1                                           |
| <b>Denmark</b>        | 21 ± 2.3                                         | 19 ± 2.1                                           |
| <b>Ecuador</b>        | 15 ± 3.2                                         | 3.6 ± 0.9                                          |
| <b>Egypt</b>          | 46 ± 5.5                                         | 0.4 ± 0.1                                          |
| <b>Estonia</b>        | 44 ± 4.4                                         | 25 ± 2.7                                           |
| <b>Finland</b>        | 25 ± 2.3                                         | 20 ± 1.9                                           |
| <b>France</b>         | 31 ± 4.4                                         | 26 ± 3.6                                           |
| <b>Germany</b>        | 34 ± 3.4                                         | 29 ± 2.7                                           |

|                      |          |           |
|----------------------|----------|-----------|
| <b>Greece</b>        | 54 ± 8.3 | 34 ± 7.1  |
| <b>Hungary</b>       | 35 ± 4.1 | 27 ± 3.4  |
| <b>Iceland</b>       | 19 ± 3.3 | 17 ± 2.5  |
| <b>India</b>         | 23 ± 2.6 | 2.4 ± 0.3 |
| <b>Indonesia</b>     | 72 ± 8.1 | 4.0 ± 0.4 |
| <b>Iran</b>          | 23 ± 2.8 | 1.1 ± 0.2 |
| <b>Ireland</b>       | 24 ± 3.2 | 24 ± 3.2  |
| <b>Israel</b>        | 42 ± 7.0 | 20 ± 3.4  |
| <b>Italy</b>         | 29 ± 2.4 | 20 ± 1.7  |
| <b>Japan</b>         | 36 ± 3.9 | 11 ± 1.3  |
| <b>Kazakstan</b>     | 46 ± 5.7 | 9.7 ± 1.4 |
| <b>Kuwait</b>        | 35 ± 4.1 | 4.0 ± 0.8 |
| <b>Lithuania</b>     | 41 ± 5.0 | 22 ± 2.7  |
| <b>Luxembourg</b>    | 27 ± 3.5 | 22 ± 3.1  |
| <b>Malaysia</b>      | 45 ± 7.2 | 1.6 ± 0.3 |
| <b>Mexico</b>        | 23 ± 2.2 | 7.6 ± 0.8 |
| <b>Montenegro</b>    | 42 ± 5.3 | 26 ± 3.4  |
| <b>Netherlands</b>   | 28 ± 2.8 | 25 ± 2.4  |
| <b>New Zealand</b>   | 21 ± 2.1 | 19 ± 1.9  |
| <b>Norway</b>        | 26 ± 2.2 | 25 ± 2.3  |
| <b>Pakistan</b>      | 41 ± 5.7 | 3.6 ± 0.6 |
| <b>Paraguay</b>      | 31 ± 5.1 | 9.0 ± 1.6 |
| <b>Peru</b>          | 21 ± 0.6 | 6.5 ± 0.8 |
| <b>Philippines</b>   | 46 ± 4.3 | 9.2 ± 1.0 |
| <b>Poland</b>        | 35 ± 3.7 | 26 ± 2.8  |
| <b>Portugal</b>      | 32 ± 4.2 | 14 ± 2.5  |
| <b>Rep. of Korea</b> | 52 ± 8.5 | 4.4 ± 1.0 |
| <b>Romania</b>       | 40 ± 4.3 | 23 ± 2.5  |
| <b>Russian Fed.</b>  | 60 ± 5.9 | 23 ± 2.5  |
| <b>Saudi Arabia</b>  | 26 ± 3.5 | 3.0 ± 0.8 |

|                    |          |           |
|--------------------|----------|-----------|
| <b>Slovakia</b>    | 41 ± 8.0 | 18 ± 4.3  |
| <b>Slovenia</b>    | 24 ± 2.9 | 19 ± 2.3  |
| <b>Spain</b>       | 34 ± 3.5 | 28 ± 2.9  |
| <b>Sweden</b>      | 22 ± 2.0 | 23 ± 2.0  |
| <b>Switzerland</b> | 28 ± 2.6 | 21 ± 1.8  |
| <b>Syria</b>       | 48 ± 6.9 | 18 ± 2.6  |
| <b>Thailand</b>    | 42 ± 3.6 | 2.4 ± 0.2 |
| <b>Tunisia</b>     | 52 ± 6.1 | 11 ± 0.2  |
| <b>Turkey</b>      | 43 ± 4.1 | 14 ± 1.4  |
| <b>UK</b>          | 22 ± 2.4 | 20 ± 2.4  |
| <b>USA</b>         | 21 ± 1.9 | 16 ± 1.5  |
| <b>Venezuela</b>   | 28 ± 4.7 | 16 ± 2.5  |

Note: The source of this data was the WHO Global Health Observatory for 2012

**Table S3 - Radon Population Attributable Risk (PAR) of Lung Cancer Mortality, estimated from extending the pooled residential studies to model lifetime exposure**

| Country        | Radon <sup>a</sup><br>GM (GSD)<br>(Bq/m <sup>3</sup> ) | PAR (%)<br>Krewski <sup>b</sup><br>Mean (95% CI) | PAR (%)<br>Darby <sup>c</sup><br>Mean (95% CI) |
|----------------|--------------------------------------------------------|--------------------------------------------------|------------------------------------------------|
| <b>median</b>  | <b>38</b>                                              | <b>10.4</b>                                      | <b>8.4</b>                                     |
| Albania        | 75 (2.2)                                               | 18.0 (0, 33.7)                                   | 14.3 (3.2, 23.5)                               |
| Algeria        | 22 (2.2)                                               | 6.4 (0, 13.1)                                    | 4.8 (1.0, 8.3)                                 |
| Argentina      | 27 (2.2)                                               | 7.7 (0, 15.6)                                    | 5.8 (1.2, 10.1)                                |
| Armenia        | 101 (1.3)                                              | 22.5 (0, 40.7)                                   | 18.2 (4.3, 29.3)                               |
| Australia      | 8.7 (2.1)                                              | 2.6 (0, 5.6)                                     | 1.9 (0.4, 3.5)                                 |
| Austria        | 61 (4.8)                                               | 15.3 (0, 29.3)                                   | 12.0 (2.6, 20.0)                               |
| Belarus        | 23 (2.2)                                               | 6.7 (0, 13.8)                                    | 5.0 (1.0, 8.8)                                 |
| Belgium        | 38 (2.0)                                               | 10.3 (0, 20.6)                                   | 7.9 (1.7, 13.5)                                |
| Brazil         | 30 (2.2)                                               | 8.4 (0, 17.1)                                    | 6.4 (1.3, 11.1)                                |
| Bulgaria       | 80 (2.1)                                               | 18.9 (0, 35.2)                                   | 15.1 (3.4, 24.7)                               |
| Canada         | 42 (2.8)                                               | 11.2 (0, 22.2)                                   | 8.6 (1.8, 14.7)                                |
| Chile          | 21 (1.8)                                               | 6.1 (0, 12.5)                                    | 4.5 (0.9, 8.0)                                 |
| China          | 34 (3.6)                                               | 9.5 (0, 19.1)                                    | 7.2 (1.5, 12.4)                                |
| Croatia        | 50 (2.3)                                               | 13.0 (0, 25.4)                                   | 10.1 (2.2, 17.0)                               |
| Cuba           | 5.2 (3.3)                                              | 1.6 (0, 3.4)                                     | 1.2 (0.2, 2.1)                                 |
| Cyprus         | 7 (2.6)                                                | 2.1 (0, 4.6)                                     | 1.6 (0.3, 2.8)                                 |
| Czech Republic | 94 (1.8)                                               | 21.4 (0, 39.0)                                   | 17.3 (4.0, 27.9)                               |
| Denmark        | 39 (2.2)                                               | 10.5 (0, 20.9)                                   | 8.1 (1.7, 13.8)                                |
| Ecuador        | 70 (2.2)                                               | 17.1 (0, 32.3)                                   | 13.5 (3.0, 22.4)                               |
| Egypt          | 6.6 (2.2)                                              | 2.0 (0, 4.3)                                     | 1.5 (0.3, 2.6)                                 |
| Estonia        | 44 (2.2)                                               | 11.8 (0, 23.2)                                   | 9.1 (1.9, 15.4)                                |
| Finland        | 84 (2.1)                                               | 19.6 (0, 36.3)                                   | 15.7 (3.6, 25.6)                               |



|               |           |                |                  |
|---------------|-----------|----------------|------------------|
| France        | 50 (2.0)  | 13.0 (0, 25.3) | 10.0 (2.2, 17.0) |
| Germany       | 37 (2.2)  | 10.0 (0, 20.1) | 7.7 (1.6, 13.2)  |
| Greece        | 44 (2.4)  | 11.7 (0, 23.1) | 9.0 (1.9, 15.3)  |
| Hungary       | 62 (2.1)  | 15.5 (0, 29.7) | 12.2 (2.7, 20.3) |
| Iceland       | 7.3 (2.2) | 2.2 (0, 4.8)   | 1.6 (0.3, 2.9)   |
| India         | 42 (2.2)  | 11.2 (0, 22.3) | 8.6 (1.8, 14.7)  |
| Indonesia     | 35 (1.2)  | 9.6 (0, 19.3)  | 7.3 (1.5, 12.6)  |
| Iran          | 61 (2.2)  | 15.3 (0, 29.4) | 12.0 (2.6, 20.1) |
| Ireland       | 51 (2.4)  | 13.2 (0, 25.7) | 10.3 (2.2, 17.3) |
| Israel        | 23 (2.2)  | 6.5 (0, 13.5)  | 4.9 (1.0, 8.6)   |
| Italy         | 52 (2.1)  | 13.5 (0, 26.2) | 10.4 (2.3, 17.6) |
| Japan         | 10 (2.0)  | 3.1 (0, 6.6)   | 2.3 (0.5, 4.1)   |
| Kazakstan     | 11 (2.2)  | 3.3 (0, 7.0)   | 2.4 (0.5, 4.3)   |
| Kuwait        | 27 (6.7)  | 7.5 (0, 15.4)  | 5.7 (1.2, 9.9)   |
| Lithuania     | 37 (4.1)  | 9.9 (0, 19.9)  | 7.6 (1.6, 13.0)  |
| Luxembourg    | 70 (2.0)  | 17.1 (0, 32.3) | 13.5 (3.0, 22.4) |
| Malaysia      | 10 (2.2)  | 3.1 (0, 6.5)   | 2.3 (0.5, 4.0)   |
| Mexico        | 82 (1.3)  | 19.3 (0, 35.8) | 15.4 (3.5, 25.2) |
| Montenegro    | 50 (3.2)  | 13.0 (0, 25.3) | 10.0 (2.2, 17.0) |
| Netherlands   | 12 (2.5)  | 3.6 (0, 7.7)   | 2.7 (0.5, 4.8)   |
| New Zealand   | 20 (2.3)  | 5.6 (0, 11.7)  | 4.2 (0.9, 7.4)   |
| Norway        | 38 (3.2)  | 10.3 (0, 20.5) | 7.9 (1.7, 13.5)  |
| Pakistan      | 52 (2.2)  | 13.4 (0, 26.0) | 10.4 (2.2, 17.5) |
| Paraguay      | 21 (2.2)  | 5.9 (0, 12.3)  | 4.5 (0.9, 7.8)   |
| Peru          | 24 (2.2)  | 6.8 (0, 13.9)  | 5.1 (1.0, 8.9)   |
| Philippines   | 22 (1.1)  | 6.3 (0, 13.0)  | 4.7 (1.0, 8.3)   |
| Poland        | 133 (1.9) | 27.3 (0, 47.5) | 22.6 (5.6, 35.4) |
| Portugal      | 45 (2.2)  | 11.9 (0, 23.5) | 9.2 (2.0, 15.6)  |
| Rep. of Korea | 49 (2.0)  | 12.8 (0, 25.0) | 9.9 (2.1, 16.7)  |
| Romania       | 84 (2.5)  | 19.7 (0, 36.4) | 15.7 (3.6, 25.7) |

|              |          |                |                  |
|--------------|----------|----------------|------------------|
| Russian Fed. | 35 (2.2) | 9.7 (0, 19.5)  | 7.4 (1.6, 12.7)  |
| Saudi Arabia | 16 (2.2) | 4.7 (0, 9.9)   | 3.5 (0.7, 6.2)   |
| Slovakia     | 48 (3.3) | 12.6 (0, 24.6) | 9.7 (2.1, 16.5)  |
| Slovenia     | 60 (2.2) | 15.1 (0, 29.0) | 11.8 (2.6, 19.8) |
| Spain        | 53 (2.5) | 13.7 (0, 26.5) | 10.6 (2.3, 17.9) |
| Sweden       | 67 (2.2) | 16.4 (0, 31.2) | 13.0 (2.9, 21.5) |
| Switzerland  | 51 (4.2) | 13.2 (0, 25.7) | 10.3 (2.2, 17.3) |
| Syria        | 33 (2.2) | 9.0 (0, 18.1)  | 6.8 (1.4, 11.8)  |
| Thailand     | 16 (1.2) | 4.7 (0, 9.8)   | 3.5 (0.7, 6.2)   |
| Tunisia      | 34 (2.2) | 9.3 (0, 18.7)  | 7.1 (1.5, 12.2)  |
| Turkey       | 57 (2.3) | 14.5 (0, 28.0) | 11.3 (2.5, 19.0) |
| UK           | 14 (3.2) | 4.1 (0, 8.7)   | 3.1 (0.6, 5.4)   |
| USA          | 25 (3.1) | 7.1 (0, 14.5)  | 5.4 (1.1, 9.3)   |
| Venezuela    | 39 (2.2) | 10.5 (0, 20.9) | 8.0 (1.7, 13.7)  |

Notes: a) The sources of the national radon geometric means (GM) and geometric standard deviations (GSD) are described in Table S1; b) the mean and 95% confidence intervals of the population attributable risk (PAR) of lung cancer mortality from radon, converted to percentage, estimated by extending the pooled North American residential radon studies of excess risk ratio after restricting the analysis to individuals having measurements for at least 20 of the 25 years of radon exposure (Krewski et al. 2006); c) the mean and 95% confidence intervals of the population attributable risk (PAR) of lung cancer mortality from radon, converted to percentage, estimated by extending the pooled European residential radon studies of excess risk ratio after adjusting the limited measurements of residential radon for random uncertainties (Darby et al. 2006).

## References

- Abu-Jarad F, Fazal-ur-Rehman, Al-Jarallah MI, Al-Shukri A. 2003. Indoor Radon Survey in Dwellings of Nine Cities in the Eastern and the Western Provinces of Saudi Arabia. *Radiat. Prot. Dosimetry* 106: 227–232.
- Al-Azmi D, Abu-Shady AI, Sayed AM, Al-Zayed Y. 2008. Indoor radon in Kuwait. *Health Phys.* 94: 49–56.
- Axelsson G, Andersson EM, Barregard L. 2015. Lung cancer risk from radon exposure in dwellings in Sweden: how many cases can be prevented if radon levels are lowered? *Cancer Causes Control* 26:541–547; doi:10.1007/s10552-015-0531-6.
- Billon S, Morin A, Caer S, Baysson H, Gambard JP, Backe JC, et al. 2005. French population exposure to radon, terrestrial gamma and cosmic rays. *Radiat. Prot. Dosimetry* 113:314–320; doi:10.1093/rpd/nch463.
- Bochicchio F, Venuti GC, S.Piermattei, G.Torri, C.Nuccetelli, S.Risica, et al. 1999. Results of the national survey on radon indoorw in all 21 Italian Regions. *Radon Living Environ.* 19-23 April 1999, Athens, Greece 997–1006.
- Canoba A, Lopez FO, Arnaud MI, Oliveira AA, Neman RS, Hadler JC, et al. 2002. Indoor radon measurements in six Latin American countries. *Geofis. Int.* 41: 453–457.
- Celebi N, Ataksor B, Taskin H, Albayrak Bingoldag N. 2015. Indoor radon measurements in Turkey dwellings. *Radiat. Prot. Dosimetry* 167:626–632; doi:10.1093/rpd/ncu329.
- Chen J, Moir D, Whyte J. 2012. Canadian population risk of radon induced lung cancer: A re-assessment based on the recent cross-Canada radon survey. *Radiat. Prot. Dosimetry* 152:9–13; doi:10.1093/rpd/ncs147.
- Cherouati DE, Djeffal S. 1988. No Title No Title. *Radiat. Prot. Dosimetry* 25:137–139; doi:10.1017/CBO9781107415324.004.
- Cosma C, Cucos A, Dicu T. 2013. PRELIMINARY RESULTS REGARDING THE FIRST MAP OF RESIDENTIAL RADON IN SOME REGIONS IN ROMANIA. 155: 343–350.
- Dowdall A, Murphy P, Pollard D, Fenton D. 2017. Update of Ireland ' s national average indoor radon concentration e Application of a new survey protocol. *J. Environ. Radioact.* 169-170:1–8; doi:10.1016/j.jenvrad.2016.11.034.
- El May MV, Omrane L, Mtimet S, Hammou A. 2008. Domestic radon in Tunisia. *Int. Nucl. Inf. Syst.* 1–6.

- Epstein L, Koch J, Riemer T, Orion I, Haquin G. 2014. Radon concentrations in different types of dwellings in Israel. *Radiat. Prot. Dosimetry* 162: 605–608.
- Espinosa G, Gammage R. 2011. An Indoor Radon Survey in Three Different Climate Regions in Mexico, and the Influence of Climate in the Obtained Values. *J. Environ. Prot. (Irvine, Calif.)* 02:1143–1148; doi:10.4236/jep.2011.29133.
- Faheem M, Rahman S, Matiullah. 2008. A review of radon measurement studies in Pakistan. *J Radiol Prot* 28:283–292; doi:10.1088/0952-4746/28/3/R02 [doi].
- Faisca MC, Teixeira MMGR, Bettencourt AO. 1992. Indoor radon concentrations in Portugal - A national survey. *Radiat. Prot. Dosimetry* 45:465–467; doi:10.1017/CBO9781107415324.004.
- Friedmann H. 2005. Final Results of the Austrian Radon Project. *Health Phys.* 89:339–348; doi:10.1097/01.HP.0000167228.18113.27.
- Hámori K, Tóth E, Losonci a., Minda M. 2006. Some remarks on the indoor radon distribution in a country. *Appl. Radiat. Isot.* 64:859–863; doi:10.1016/j.apradiso.2006.02.098.
- Haucke F. 2010. The cost effectiveness of radon mitigation in existing German dwellings - A decision theoretic analysis. *J. Environ. Manage.* 91:2263–2274; doi:10.1016/j.jenvman.2010.06.015.
- Ivanova K, Stojanovska Z, Badulin V, Kunovska B, Protection R, Delcev G, et al. 2013. PILOT SURVEY OF INDOOR RADON IN THE DWELLINGS. 157: 594–599.
- Kim Y, Chang BU, Park HM, Kim CK, Tokonami S. 2011. National radon survey in Korea. *Radiat. Prot. Dosimetry* 146:6–10; doi:10.1093/rpd/ncr094.
- Kozak K, Mazur J, Kozłowska B, Karpińska M, Przylibski T a., Mamont-Cieśla K, et al. 2011. Correction factors for determination of annual average radon concentration in dwellings of Poland resulting from seasonal variability of indoor radon. *Appl. Radiat. Isot.* 69:1459–1465; doi:10.1016/j.apradiso.2011.05.018.
- Križman M, Lič R, Skvarč J, Jeran Z. 1996. A survey of indoor radon concentrations in dwellings in Slovenia. *Int. Nucl. Inf. Syst. INIS-XA-C--071, IAEA* 66–70.
- Langroo MK, Wise KN, Duggleby JC, Kotler LH. 1990. A nation-wide survey of radon and gamma radiation levels in Australian homes.

- Marcinowski F, Lucas RM, Yeager WM. 1994. National and regional distributions of airborne radon concentrations in U.S. homes. *Health Phys.* 66: 699–706.
- Menzler S, Piller G, Gruson M, Rosario AS, Wichmann H-E, Kreienbrock L. 2008. Population attributable fraction for lung cancer due to residential radon in Switzerland and Germany. *Health Phys.* 95:179–189; doi:10.1097/01.HP.0000309769.55126.03.
- Nikolopoulos D, Louizi a., Serefoglou a., Malamitsi J. 2005. Radon exposure of the Greek population. *Radioact. Environ.* 7:425–430; doi:10.1016/S1569-4860(04)07049-4.
- Othman I, Hushari M, Raja G, Alsawaf A. 1996. Radon in Syrian houses. *J. Radiol. Prot.* 16: 45–50.
- Pahapill L, Rulkov A, Rajamäe R, Åkerblom G. 2003. Radon in Estonian dwellings - Results from a National Radon Survey.
- Przylibski T a. 2015. Radon Research in Poland: A Review. *Solid State Phenom.* 238:90–115; doi:10.4028/www.scientific.net/SSP.238.90.
- Radolić V, Vuković B, Stanić D, Katić M, Faj Z, Šuveljak B, et al. 2006. National survey of indoor radon levels in Croatia. *J. Radioanal. Nucl. Chem.* 269:87–90; doi:10.1007/s10967-006-0234-2.
- Sainz-Fernandez C, Fernandez-Villar a., Fuente-Merino I, Gutierrez-Villanueva JL, Martin-Matarranz JL, Garcia-Talavera M, et al. 2014. The Spanish indoor radon mapping strategy. *Radiat. Prot. Dosimetry* 162:58–62; doi:10.1093/rpd/ncu218.
- Smetsers RCGMR, Blaauboer ROR, Dekkers SAJF. 2016. Ingredients for a Dutch radon action plan , based on a national survey in more than 2500 dwellings. *J. Environ. Radioact.* 165:93–102; doi:10.1016/j.jenvrad.2016.09.008.
- Stigum H, Strand T, Magnus P. 2003. Should radon be reduced in homes? A cost-effect analysis. *Health Phys.* 84:227–235; doi:10.1097/00004032-200302000-00011.
- Stuardo E. 1996. Natural radiation measurements in Chile. *Radiat. Prot. Dosimetry* 67:129–133; doi:10.1017/CBO9781107415324.004.
- Suzuki G, Yamaguchi I, Ogata H, Sugiyama H, Yonehara H, Kasagi F, et al. 2010. A nation-wide survey on indoor radon from 2007 to 2010 in Japan. *J. Radiat. Res.* 51:683–689; doi:10.1269/jrr.10083.
- Tushe K, Bylyku E, Xhixha G, Dhoqina P, Daci B, Cfarku F, et al. 2016. First step towards the geographical distribution of indoor radon in dwellings in Albania. *Radiat. Prot. Dosimetry* 172:488–495; doi:10.1093/rpd/ncv494.

United Nations Scientific Committee on the Effects of Atomic Radiation. 2000. UNSCEAR 2000 Report: Sources and effects of ionizing radiation. I.

United Nations Scientific Committee on the Effects of Atomic Radiation. 2006. UNSCEAR 2006 - Annex E - Sources-to-effects assessment for radon in homes and workplaces.

Veiga LH, Melo VP, Brand KP. 2007. 8th International Symposium on Natural Radiation Environment. Attrib. risk due to Resid. radon Expo. Brazil.

Vicanova M, Durcik M, Nikodemova D. 1998. Radiation load from radon exposure in Slovakia. 21st Radiat. Hyg. Days RHD Jasna Pod Chopkom 209–212.

Vukotic P, Antovic N, Zekic R, Svrkota R. 2008. Indoor Radon Concentrations in the Coastal and Central Regions of Montenegro. Int. Radiat. Prot. Assoc. IRPA12 1–10.

Yarmoshenko I, Malinovsky G, Vasilyev a., Zhukovsky M. 2015. Reconstruction of national distribution of indoor radon concentration in Russia using results of regional indoor radon measurement programs. J. Environ. Radioact. 150:99–103; doi:10.1016/j.jenvrad.2015.08.007.
